# Supplementary material for: Humidity-dependent compression-induced glass transition of the air–water interfacial Langmuir films of poly(d,l-lactic acid-ran-glycolic acid) (PLGA)
Source: Royal Society of Chemistry journal article supplement (doi:10.1039/c4sm02535k), 2015-01-01

Electronic Supplementary Information (ESI) for

**Humidity-Dependent Compression-Induced Glass Transition of  
the Air-Water Interfacial Langmuir Films of Poly(D,L-lactic acid-  
*ran*-glycolic acid) (PLGA)**

**Hyun Chang Kim,<sup>a</sup> Hoyoung Lee,<sup>a</sup> Hyunjung Jung,<sup>b</sup> Yun Hwa Choi,<sup>a</sup> Mati Meron,<sup>c</sup>  
Binhua Lin,<sup>c</sup> Joona Bang,<sup>b</sup> You-Yeon Won<sup>a,\*</sup>**

<sup>a</sup> School of Chemical Engineering, Purdue University, West Lafayette, Indiana 47907

<sup>b</sup> Department of Chemical and Biological Engineering, Korea University, Seoul, Korea 136-  
713

<sup>c</sup> Advanced Photon Source, University of Chicago, Chicago, Illinois 60439

---

\* To whom correspondence should be addressed. E-mail: [yywon@ecn.purdue.edu](mailto:yywon@ecn.purdue.edu)

## S1. Box Model Analysis of the XR Data

The so-called box-model method was used to convert the X-ray reflectivity (XR) profiles to the real-space electron density profiles. For this analysis, the original XR data were first shifted horizontally by adding a small offset ( $q_{z,\text{offset}}$ ) to the original  $q_z$  values, and then also vertically slightly by multiplication of the reflectivity data ( $R(q_z)$ ) by a constant factor ( $R_{\text{shift}}$ ), in order to match the measured values of  $q_z$  and  $R(q_z)$  at the critical angle to those of the Fresnel reflectivity situation:

$$q_z = q_{z,\text{original}} + q_{z,\text{offset}}; \quad (\text{S1})$$

$$R(q_z) = R_{\text{original}}(q_z) \times R_{\text{shift}}. \quad (\text{S2})$$

Then this modified reflectivity profile was normalized by the theoretical Fresnel reflectivity profile:

$$R_F(q_z) = \frac{\left| q_z - \sqrt{q_z^2 - q_c^2 - 4ik\mu} \right|^2}{\left| q_z + \sqrt{q_z^2 - q_c^2 - 4ik\mu} \right|^2}. \quad (\text{S3})$$

The box-model fitting analysis was performed on this normalized data ( $R(q_z)/R_F(q_z)$ ). We assumed that the monolayer is composed of four sublayers (i.e., “boxes”) of variable thickness ( $\mathbf{d}_1, \mathbf{d}_2, \mathbf{d}_3, \mathbf{d}_4$ ) and electron density ( $\rho_{e,1}, \rho_{e,2}, \rho_{e,3}, \rho_{e,4}$ ), each bounded by error function-type interfaces of variable roughness ( $\sigma_1, \sigma_2, \sigma_3, \sigma_4, \sigma_5$ ):

$$\begin{aligned}
\rho_e(z) = & \frac{(\rho_{e,1}-\rho_{e,air})}{2} \left( 1 + \operatorname{erf} \left( \frac{z}{\sqrt{2\sigma_1^2}} \right) \right) + \frac{(\rho_{e,2}-\rho_{e,1})}{2} \left( 1 + \operatorname{erf} \left( \frac{z-d_1}{\sqrt{2\sigma_2^2}} \right) \right) + \frac{(\rho_{e,3}-\rho_{e,2})}{2} \left( 1 + \right. \\
& \left. \operatorname{erf} \left( \frac{z-(d_1+d_2)}{\sqrt{2\sigma_3^2}} \right) \right) + \frac{(\rho_{e,4}-\rho_{e,3})}{2} \left( 1 + \operatorname{erf} \left( \frac{z-(d_1+d_2+d_3)}{\sqrt{2\sigma_4^2}} \right) \right) + \\
& \frac{(\rho_{e,sub}-\rho_{e,4})}{2} \left( 1 + \operatorname{erf} \left( \frac{z-(d_1+d_2+d_3+d_4)}{\sqrt{2\sigma_5^2}} \right) \right). \tag{S4}
\end{aligned}$$

The assumed electron density profile calculated using Equation S4 was converted through the first Born approximation to an expected XR profile. Then this predicted XR profile was compared with the experimental data. This process was repeated to find the thickness, electron density and roughness values that minimize the sum of the magnitudes of the differences between the measured and calculated XR values at all the data points:

$$\varepsilon = \sum_{i=1}^N \left( \frac{|R_{\text{experiment},i}(q_z) - R_{\text{calculation},i}(q_z)|}{R_{F,i}(q_z)} \right). \tag{S5}$$

A more detailed discussion of this procedure is given in Lee et al. *Soft Matter* 10, 3771 (2014).

**Figure S1.** Surface pressure vs. area isotherms of a PLGA monolayer measured at 25 °C during compression at a rate of 3 mm/min at two different Wilhelmy plate orientations relative to the barriers of the Langmuir trough (i.e., “parallel” and “perpendicular”). See Figure 1 of Cicuta & Terentjev, *Eur. Phys. J. B*, 16, 147 (2005) for graphical illustration of the definitions of the “parallel” vs. “perpendicular” configurations.

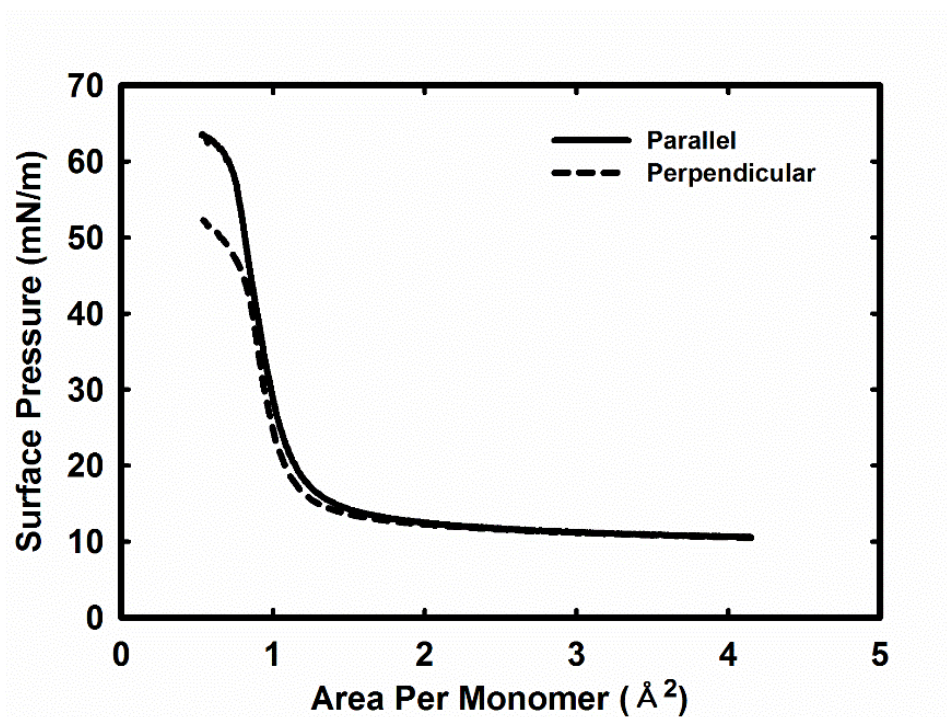

**Figure S2.** Normalized XR profiles ( $R(q_z)/R_F(q_z)$ ) from PLGA monolayers at eight different area per monomer conditions. Points are experimental data. Solid lines are theoretical fits to the data. The procedures for this box-model fitting analysis are described in Section S1 of the Supporting Information (SI). The normalized electron density profiles ( $\rho_e(z)/\rho_{e,water,\infty}$ ) obtained from this analysis are presented in Figure 1(b). The values of the best-fit parameters are presented in Table S1 (SI).

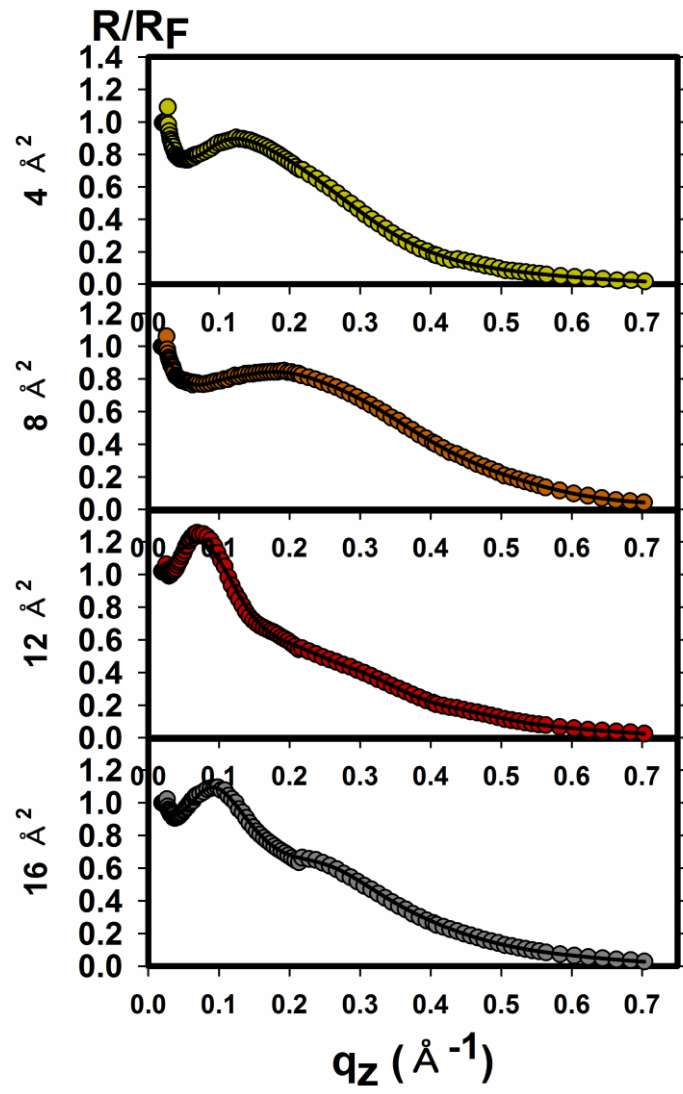

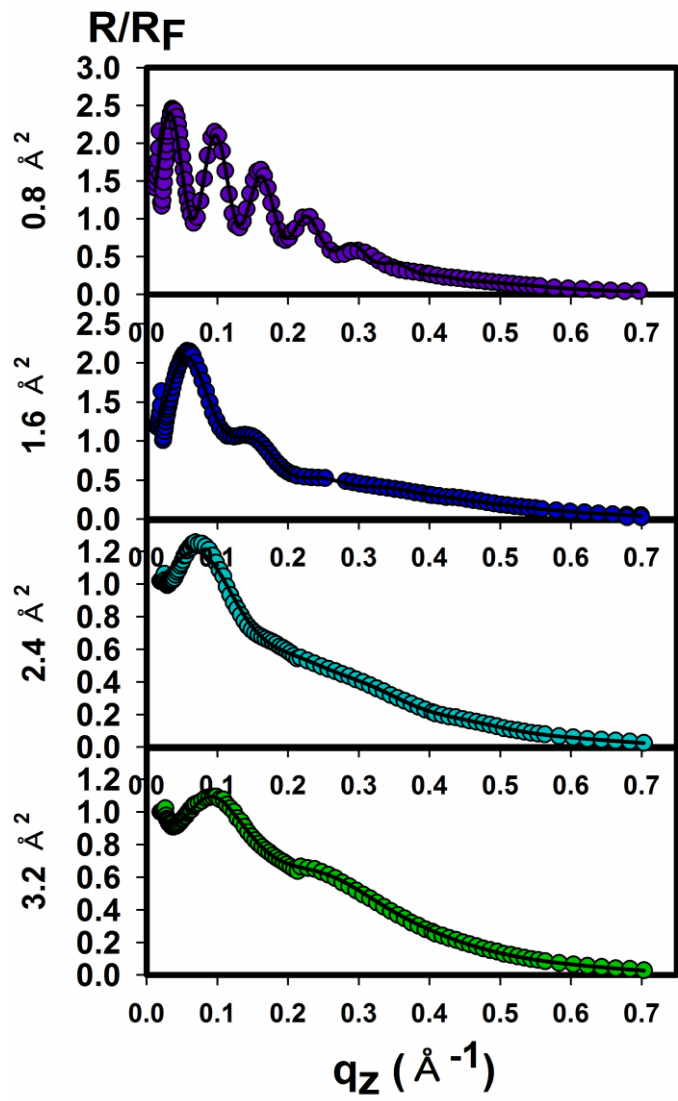

**Table S1.** Box model fit parameters for the normalized electron density profiles shown in Figure 1(b). The actual reflectivity data are presented in Figure S2. The notations,  $d_i$ ,  $\rho_{e,i}$ , and  $\sigma_i$ , denote the thickness, electron density and roughness of the  $i$ -th sublayer (or interface) within the monolayer, respectively. The subscript value “1” corresponds to the sublayer (or interface) closest to the bulk air phase, and the highest subscript number designates the sublayer (or interface) closest to the bulk water.

| Monolayer | Area per monomer ( $\text{\AA}^2$ ) | $d_1$ ( $\text{\AA}$ ) | $d_2$ ( $\text{\AA}$ ) | $d_3$ ( $\text{\AA}$ ) | $d_4$ ( $\text{\AA}$ ) | $\rho_{e,1} / \rho_{e,\text{water},\infty}$ | $\rho_{e,2} / \rho_{e,\text{water},\infty}$ | $\rho_{e,3} / \rho_{e,\text{water},\infty}$ | $\rho_{e,4} / \rho_{e,\text{water},\infty}$ | $\sigma_1$ ( $\text{\AA}$ ) | $\sigma_2$ ( $\text{\AA}$ ) | $\sigma_3$ ( $\text{\AA}$ ) | $\sigma_4$ ( $\text{\AA}$ ) | $\sigma_5$ ( $\text{\AA}$ ) |
|-----------|-------------------------------------|------------------------|------------------------|------------------------|------------------------|---------------------------------------------|---------------------------------------------|---------------------------------------------|---------------------------------------------|-----------------------------|-----------------------------|-----------------------------|-----------------------------|-----------------------------|
| 16        | 66                                  | 6.416                  | 12.95                  | 8.641                  | 7.780                  | 1.03891                                     | 0.96656                                     | 0.98442                                     | 0.99067                                     | 2.157                       | 2.0752                      | 4.0693                      | 3.145                       | 5.303                       |
|           |                                     |                        |                        |                        |                        |                                             |                                             |                                             |                                             |                             |                             |                             |                             |                             |
| 12        | 42                                  | 8.292                  | -                      | 17.79                  | 5.339                  | 1.03461                                     | 0.94974                                     | 0.91921                                     | 0.92401                                     | 2.263                       | 2.1863                      | 0.3423                      | 2.545                       | 19.91                       |
|           |                                     |                        |                        |                        |                        |                                             |                                             |                                             |                                             |                             |                             |                             |                             |                             |
| 8         | 76                                  | 9.978                  | 12.85                  | 8.378                  | 16.17                  | 0.98239                                     | 0.91088                                     | 0.92012                                     | 0.95310                                     | 2.404                       | 1.9198                      | 1.0164                      | 7.609                       | 16.13                       |
|           |                                     |                        |                        |                        |                        |                                             |                                             |                                             |                                             |                             |                             |                             |                             |                             |
| 4         | 51                                  | 8.446                  | 3.823                  | 9.780                  | 11.12                  | 0.96505                                     | 1.02311                                     | 0.91089                                     | 0.85639                                     | 2.923                       | 2.4166                      | 3.9719                      | 10.48                       | 20.87                       |
|           |                                     |                        |                        |                        |                        |                                             |                                             |                                             |                                             |                             |                             |                             |                             |                             |
| 4'        | 95                                  | 13.91                  | -                      | 17.67                  | 21.74                  | 1.00654                                     | 0.98815                                     | 1.02198                                     | 0.93845                                     | 2.797                       | -                           | 4.6338                      | 6.898                       | 19.55                       |
|           |                                     |                        |                        |                        |                        |                                             |                                             |                                             |                                             |                             |                             |                             |                             |                             |
| 3.2       | 5                                   | 9.993                  | 7.266                  | 14.60                  | 11.68                  | 0.98736                                     | 1.05761                                     | 1.08726                                     | 1.03757                                     | 2.917                       | 1.6984                      | 1.9078                      | 4.148                       | 5.439                       |
|           |                                     |                        |                        |                        |                        |                                             |                                             |                                             |                                             |                             |                             |                             |                             |                             |



|            |             |             |              |             |              |              |              |         |             |              |              |             |             |
|------------|-------------|-------------|--------------|-------------|--------------|--------------|--------------|---------|-------------|--------------|--------------|-------------|-------------|
| <b>2.4</b> | 8.612<br>3  | 19.69<br>05 | 19.23<br>58  | 13.73<br>39 | 0.92269<br>5 | 1.33454      | 1.21351      | 1.12368 | 2.454<br>16 | 7.0060<br>2  | 8.4665<br>7  | 7.445<br>21 | 6.686<br>21 |
| <b>1.6</b> | 8.015<br>64 | 22.04<br>99 | -<br>29.0253 | 95.36<br>92 | 1.08276      | 1.19639      | 1.1869       | 1.28099 | 2.778<br>02 | 2.1990<br>8  | 0.0763<br>13 | 4.514<br>89 | 6.240<br>3  |
| <b>0.8</b> | 12.44<br>19 | 5.429<br>95 | 12.85<br>31  | 20.48<br>64 | 1.0169       | 0.99630<br>1 | 0.96753<br>6 | 0.95066 | 2.696<br>95 | 0.5590<br>41 | 4.7785<br>5  | 4.545<br>9  | 11.32<br>06 |

**Figure S3.** Thicknesses of the PLGA monolayer at various area per chain conditions determined from the XR data shown in Figure 1; the monolayer thickness is defined as the distance between the mid-electron-density point on the air side and the mid-electron-density point on the water side of the monolayer. These experimentally determined thicknesses are compared with the film thickness values calculated using a value of 1.58 g/cc for the bulk density of PLGA.

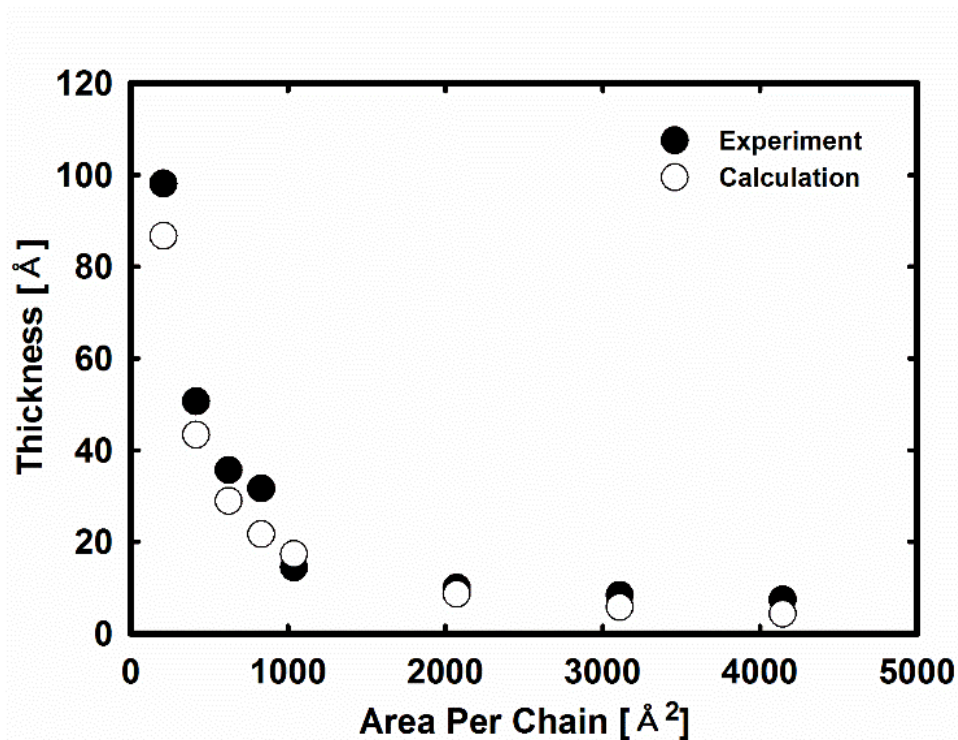

**Figure S4. (a)** Surface pressure relaxation profiles of Langmuir PLGA films at a constant film area of  $0.8 \text{ \AA}^2$  per monomer at 25 and 40 °C. **(b)** A surface area vs. time profile of a Langmuir PLGA film at a constant pressure of 30 mN/m at 25°C. The monolayer samples were initially prepared at  $2.78 \text{ \AA}^2$  per monomer and then compressed at a rate of 3 mm/min to the  $0.8 \text{ \AA}^2$  per monomer condition (i.e., to the 30 mN/m surface pressure condition) before these measurements began.

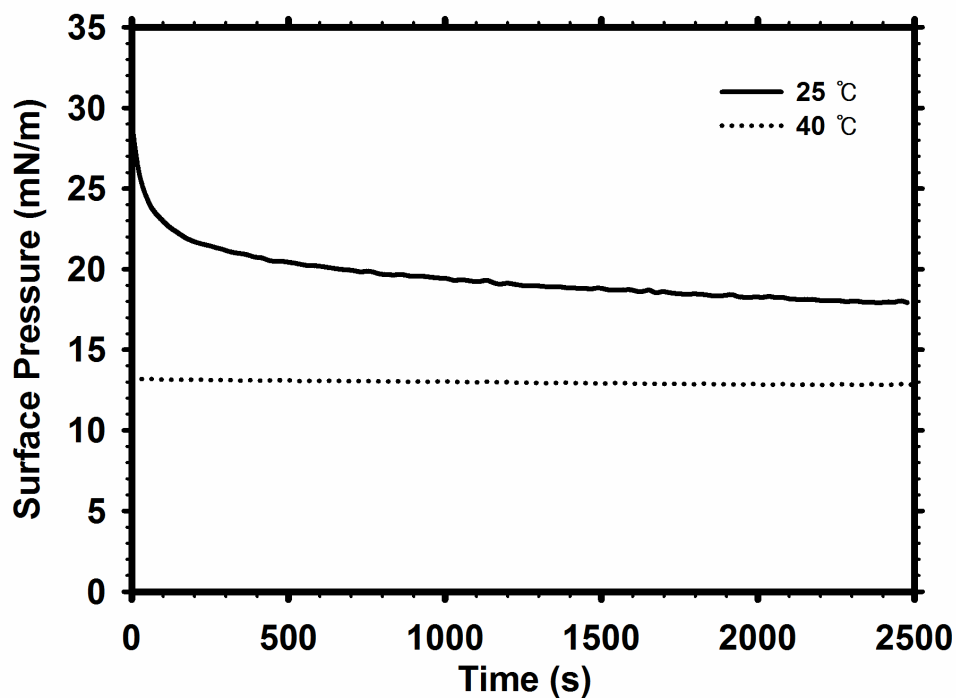

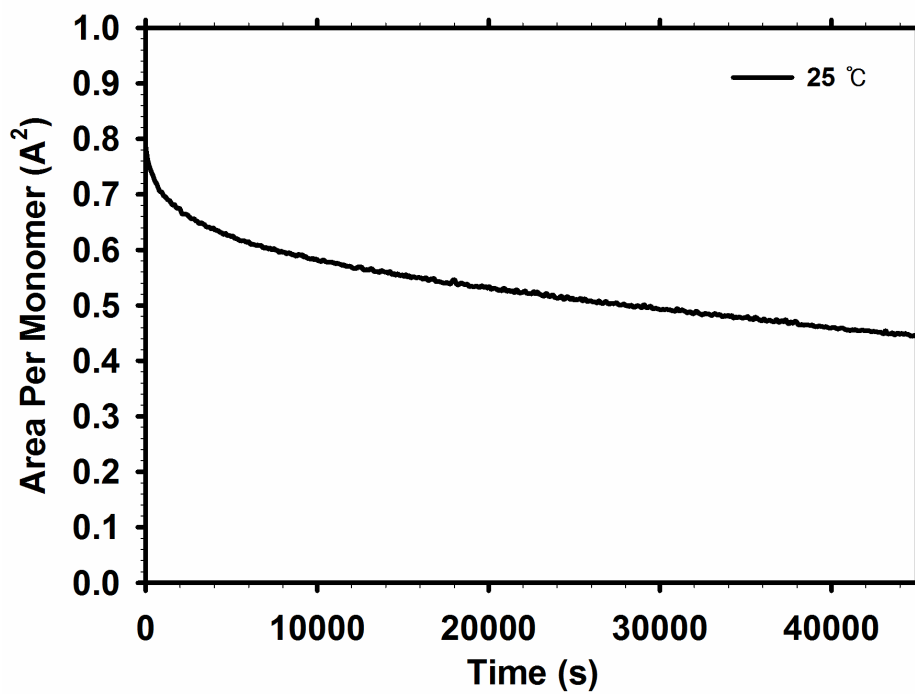

**Figure S5.** A time series of normalized XR profiles ( $R(q_z)/R_F(q_z)$ ) from a Langmuir PLGA film at a constant surface pressure of 30 mN/m; the monolayer was initially prepared at an area of 4  $\text{\AA}^2$  per monomer and then compressed at a rate of 2  $\text{cm}^2/\text{min}$  (trough width 98 mm, length 350 mm) to the 30 mN/m surface pressure condition before these measurements began. Points are experimental data. Solid lines are theoretical fits to the data. The procedures for this box-model fitting analysis are described in Section S1 of the Supporting Information (SI). The normalized electron density profiles ( $\rho_e(z)/\rho_{e,water,\infty}$ ) obtained from this analysis are presented in Figure 5(b). The values of the best-fit parameters are presented in Table S2 (SI).

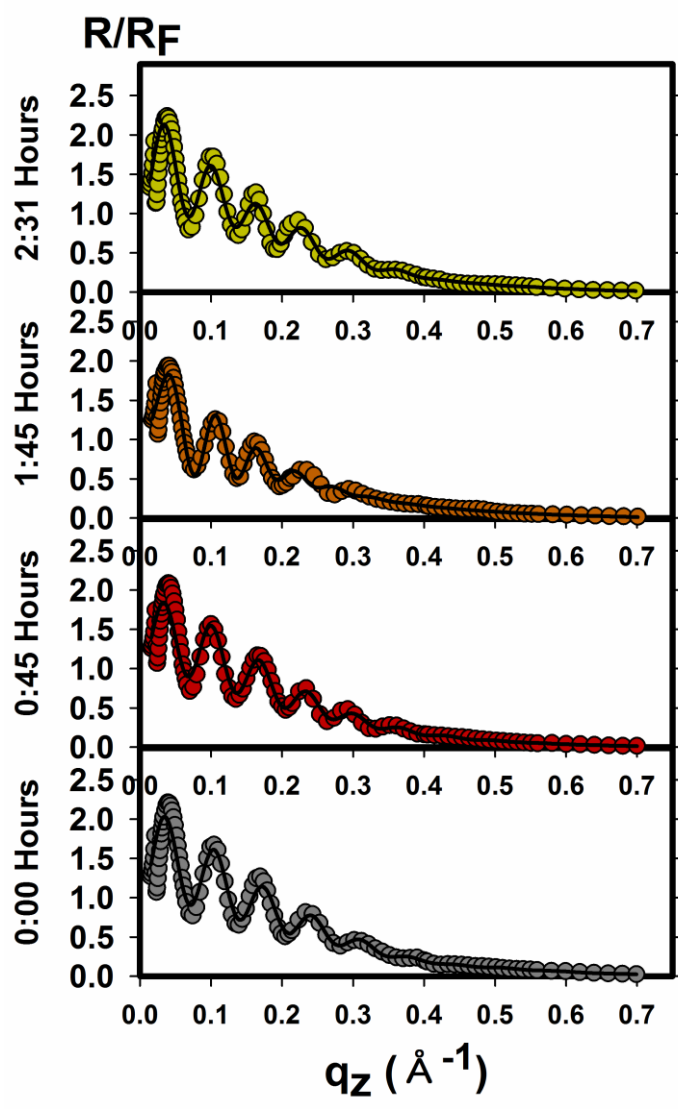

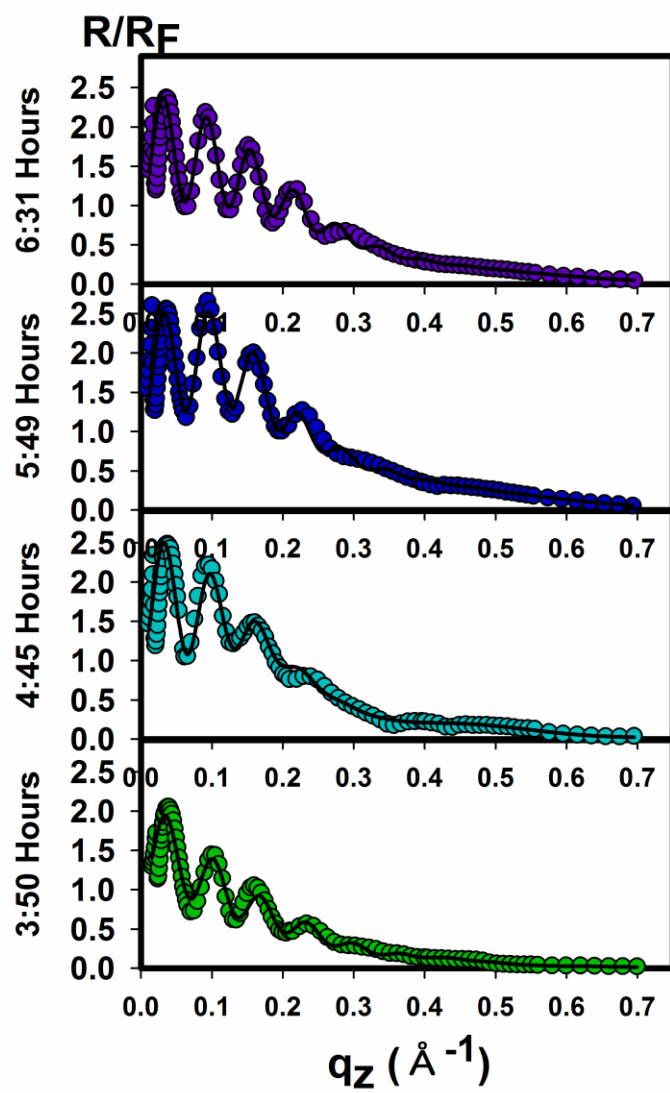

**Table S2.** Box model fit parameters for the normalized electron density profiles shown in Figure 5(b). The actual reflectivity data are presented in Figure S5. The notations,  $d_i$ ,  $\rho_{e,i}$ , and  $\sigma_i$ , denote the thickness, electron density and roughness of the  $i$ -th sublayer (or interface) within the monolayer, respectively. The subscript value “1” corresponds to the sublayer (or interface) closest to the bulk air phase, and the highest subscript number designates the sublayer (or interface) closest to the bulk water.

| XR Measurement             | $d_1$       | $d_2$       | $d_3$       | $d_4$       | $\rho_{e,1}$              | $\rho_{e,2}$              | $\rho_{e,3}$              | $\rho_{e,4}$              | $\sigma_1$  | $\sigma_2$   | $\sigma_3$   | $\sigma_4$   | $\sigma_5$  |
|----------------------------|-------------|-------------|-------------|-------------|---------------------------|---------------------------|---------------------------|---------------------------|-------------|--------------|--------------|--------------|-------------|
| Start Time (hours:minutes) | (Å)         | (Å)         | (Å)         | (Å)         | / $\rho_{e,water,\infty}$ | / $\rho_{e,water,\infty}$ | / $\rho_{e,water,\infty}$ | / $\rho_{e,water,\infty}$ | (Å)         | (Å)          | (Å)          | (Å)          | (Å)         |
| <b>0:00</b>                | 6.819<br>56 | 15.10<br>51 | 46.64<br>86 | 22.40<br>12 | 0.96279<br>8              |                           |                           |                           | 2.745<br>65 | -<br>3.52975 | -<br>3.08839 | -<br>0.16186 | 5.426<br>36 |
| <b>0:45</b>                | 6.955<br>11 | 11.83<br>59 | 55.59<br>87 | 19.54<br>38 | 0.94552<br>4              |                           |                           |                           | 2.911<br>41 | -<br>3.69149 | -<br>4.05022 | -<br>4.51263 | 5.166<br>44 |
| <b>1:45</b>                | 8.824<br>72 | 9.266<br>37 | 78.17<br>33 | 18.08<br>69 | 0.92680<br>3              |                           |                           | 0.75353<br>9              | 3.017<br>92 | 2.447<br>15  | -<br>16.4992 | 16.68<br>75  | 7.918<br>94 |
| <b>2:31</b>                | 6.511<br>63 | 14.63<br>99 | 53.25<br>66 | 21.17<br>05 | 0.97812<br>7              |                           |                           |                           | 2.918<br>61 | -<br>4.1058  | -<br>2.87444 | -<br>4.25562 | 5.785<br>33 |
| <b>3:50</b>                | 4.244<br>49 | 23.61<br>19 | 50.65<br>5  | 15.39<br>85 | 0.73503<br>3              |                           |                           |                           | 2.864<br>93 | 6.747<br>56  | -<br>0.34623 | 12.22<br>67  | 5.421<br>57 |
| <b>4:45</b>                | 8.181<br>54 | 9.711<br>21 | 2.598<br>92 | 75.66<br>24 |                           |                           |                           |                           | 2.835<br>79 | 2.965<br>59  | -<br>1.15006 | -<br>1.17637 | 9.528<br>63 |
| <b>5:49</b>                | 7.982       | 5.284       | 46.72       | 38.85       | 1.23853                   | 1.55243                   | 1.28876                   | 1.27178                   | 2.607       | -            | -            | -            | 6.605       |



|             |       |       |       |       |       |         |         |         |       |         |         |         |       |
|-------------|-------|-------|-------|-------|-------|---------|---------|---------|-------|---------|---------|---------|-------|
|             | 47    | 81    | 8     | 66    |       |         |         |         | 48    | 3.80171 | 12.9802 | 5.1055  | 93    |
|             | 7.916 | 4.926 | 43.58 | 45.75 |       |         |         |         | 2.612 | -       | -       | -       | 6.195 |
| <b>6:31</b> | 76    | 26    | 78    | 07    | 1.108 | 1.37735 | 1.28171 | 1.26792 | 07    | 3.77783 | 4.61015 | 12.9379 | 25    |

**Figure S6.** Normalized electron density profiles ( $\rho_e(z)/\rho_{e,water,\infty}$ ) obtained from the box-model analysis of the XR data for the compressed and as-spread PLGA films at an area of  $0.8 \text{ \AA}^2$  per monomer.

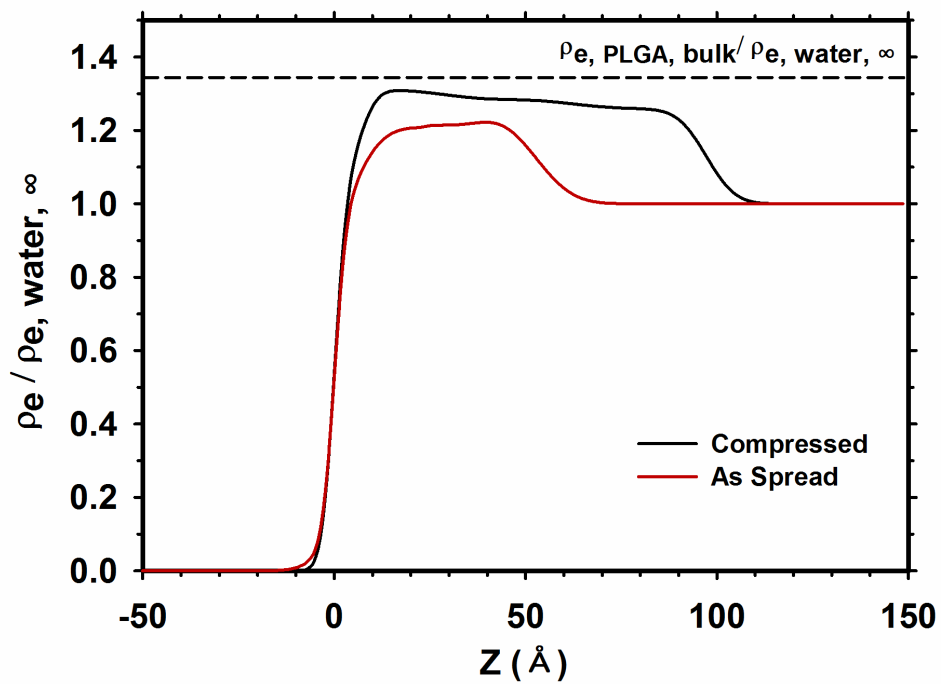

Supplement: c4sm02535k1.pdf [file c4sm02535k1.pdf]
